# Supplementary material for: Structural evolution and magnetic properties of CoII coordination polymers varied from 1D to 3D constructed by 1,4-bis(1,2,4-triazol-1-ylmethyl)benzene
Source: Royal Society of Chemistry journal article supplement (doi:10.1039/c1dt10282f), 2011-01-01
Supplement: c1dt10282f.pdf [file c1dt10282f.pdf]

# Structural Evolution and Magnetic Properties of $\text{Co}^{\text{II}}$ Coordination Polymers Varied From 1D to 3D Constructed by 1,4-Bis(1,2,4-triazol-1-ylmethyl)-Benzene

Shi-Yuan Zhang, Zhen-Jie Zhang, Wei Shi,\* Bin Zhao, Peng Cheng,\* Dai-Zheng Liao,  
Shi-Ping Yan

*Department of Chemistry and Key Laboratory of Advanced Energy Material  
Chemistry, Ministry of Education, Nankai University, Tianjin 300071, P. R. China*

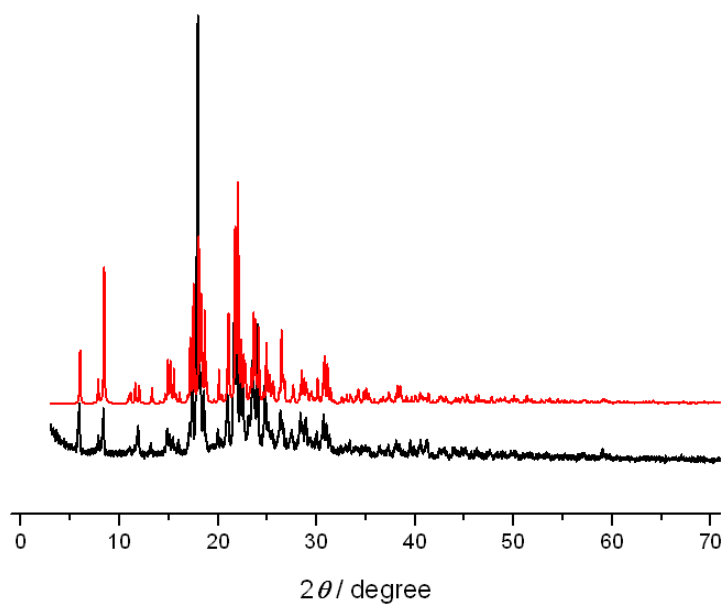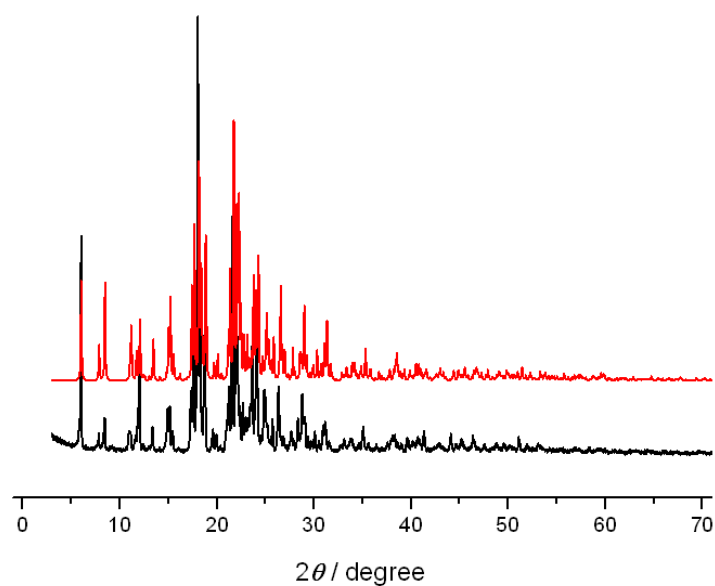

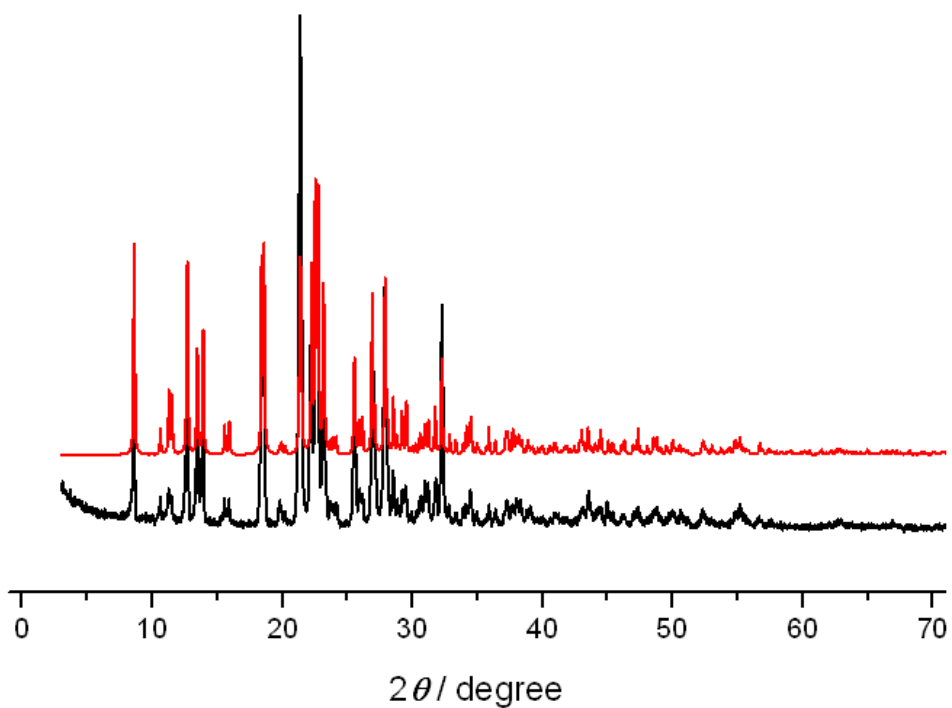

(c)

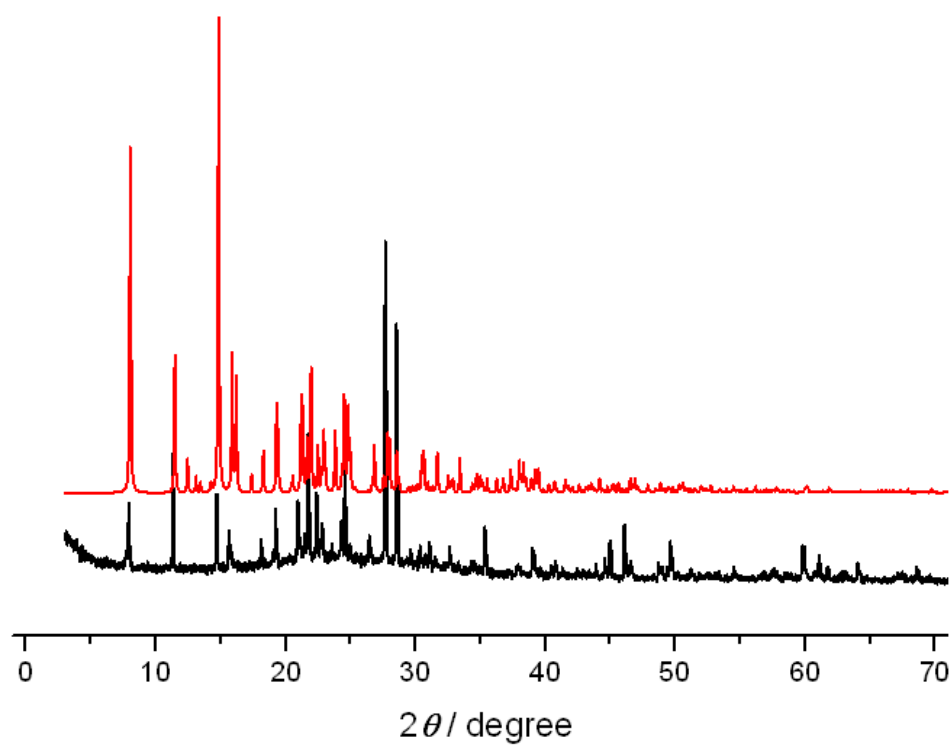

(d)

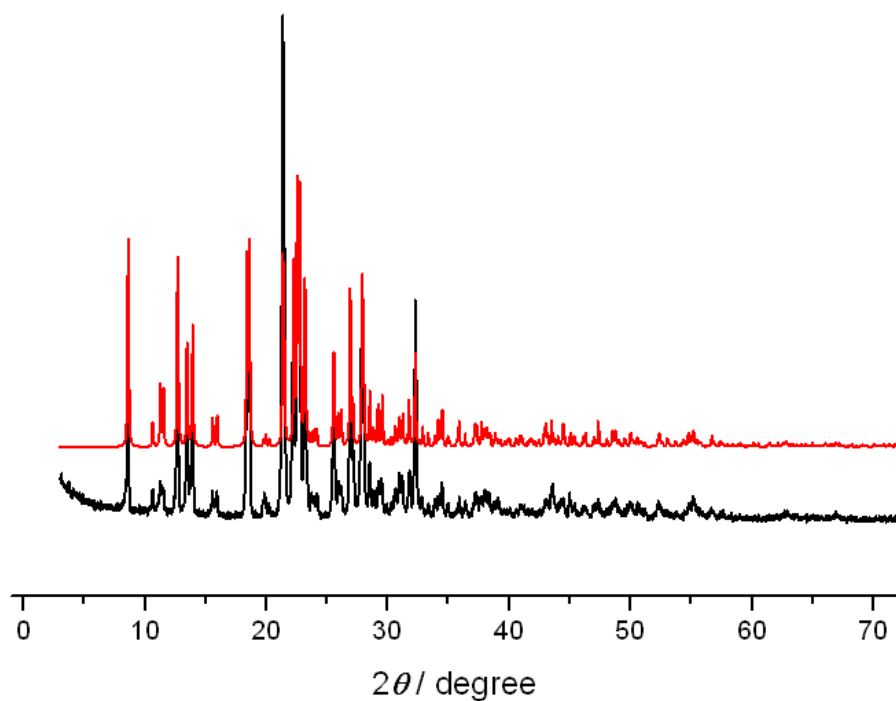

(e)

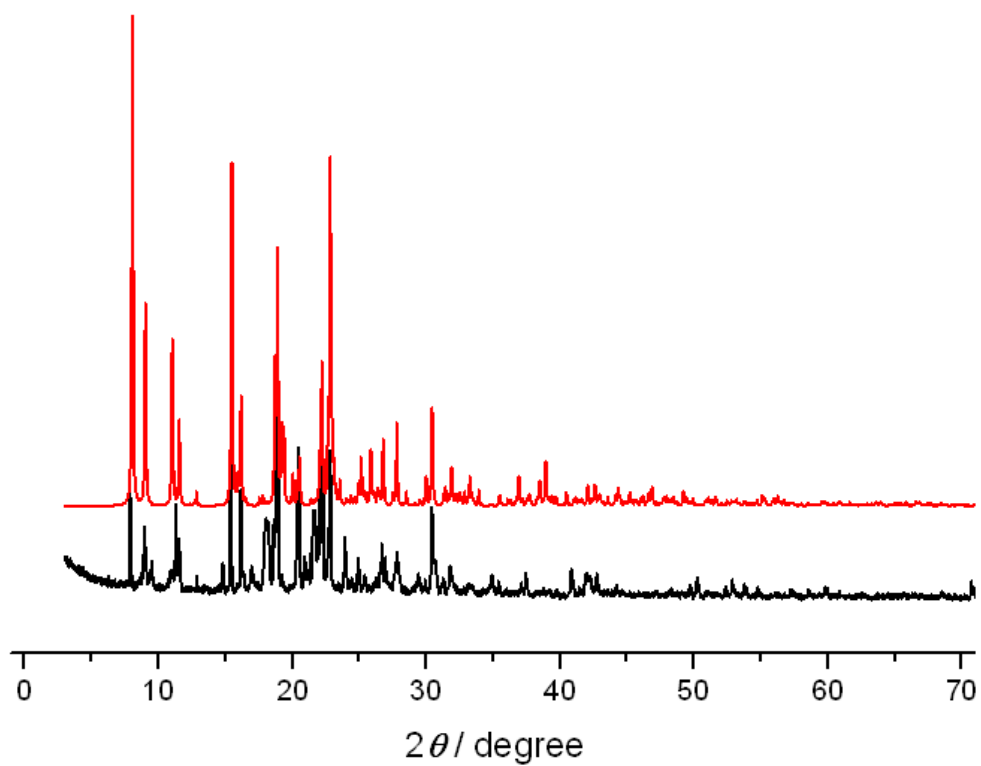

(f)

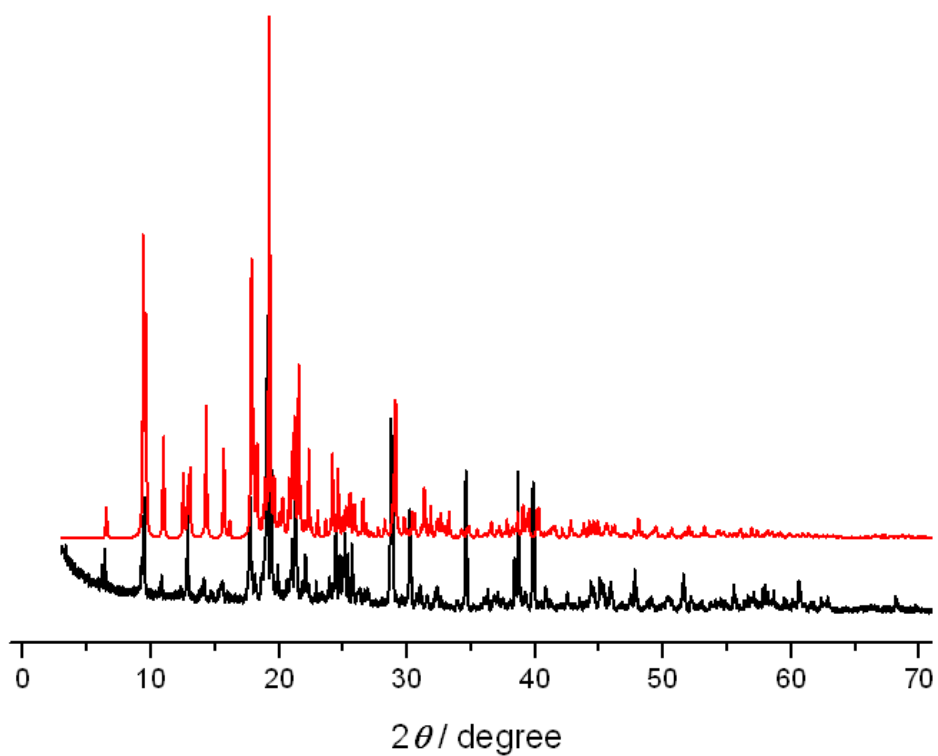

(g)

Figure S1 Powder X-ray diffraction spectra comparison of complexes **1-7**, corresponding to (a)-(g). Black lines response to the experimental data and red lines response to the simulated data.

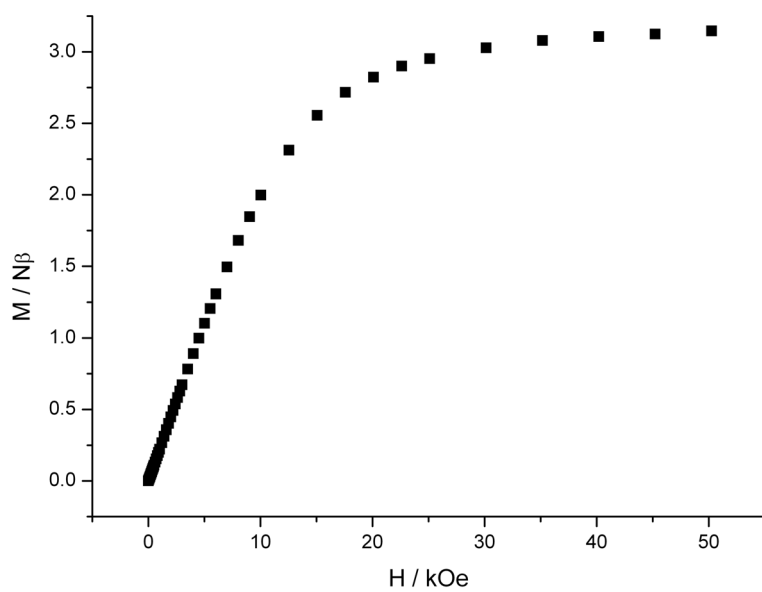

(a)

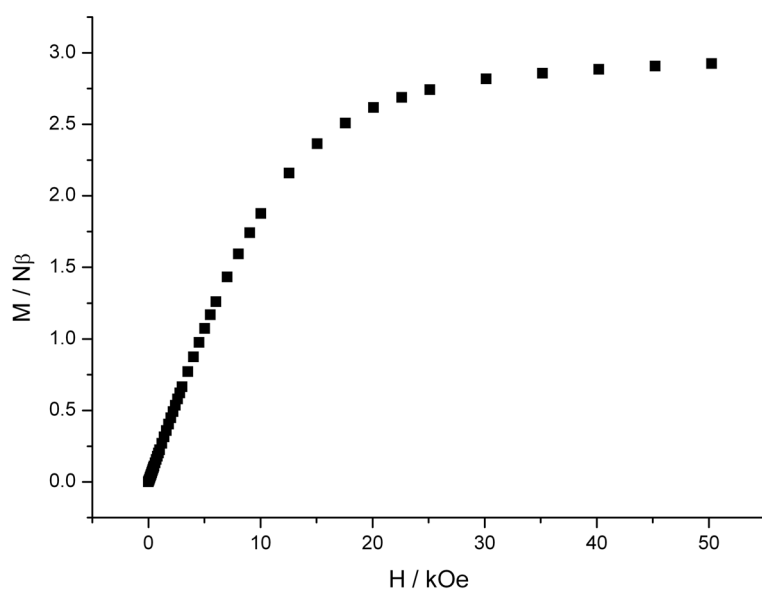

(b)

Figure S2 The magnetization curves of **6** (a) and **7** (b) measured at 2 K.

**Table S1** The Coordination Environment of the Cobalt Atom in Compounds **1-7**. Selected Interatomic Distances (Å) and Angles (deg)

| complex 1         |            |                     |            |                     |            |
|-------------------|------------|---------------------|------------|---------------------|------------|
| Co(1)-O(1)        | 2.067(2)   | O(1)-Co(1)-N(1)     | 89.94(11)  | N(1)-Co(1)-N(7)     | 88.93(10)  |
| Co(1)-O(1)#1      | 2.067(2)   | O(1)#1-Co(1)-N(1)   | 90.06(11)  | N(1)#1-Co(1)-N(7)   | 91.07(10)  |
| Co(1)-N(1)        | 2.154(3)   | O(1)-Co(1)-N(1)#1   | 90.06(11)  | O(1)-Co(1)-N(7)#1   | 90.69(10)  |
| Co(1)-N(1)#1      | 2.154(3)   | O(1)#1-Co(1)-N(1)#1 | 89.94(11)  | O(1)#1-Co(1)-N(7)#1 | 89.31(10)  |
| Co(1)-N(7)        | 2.171(3)   | N(1)-Co(1)-N(1)#1   | 180.000(1) | N(1)-Co(1)-N(7)#1   | 91.07(10)  |
| Co(1)-N(7)#1      | 2.171(3)   | O(1)-Co(1)-N(7)     | 89.31(10)  | N(1)#1-Co(1)-N(7)#1 | 88.93(10)  |
| O(1)-Co(1)-O(1)#1 | 180.00(6)  | O(1)#1-Co(1)-N(7)   | 90.69(10)  | N(7)-Co(1)-N(7)#1   | 180.00(13) |
| complex 2         |            |                     |            |                     |            |
| Co(1)-O(1)        | 2.082(2)   | O(1)-Co(1)-N(7)     | 90.71(11)  | N(7)-Co(1)-N(1)     | 91.09(12)  |
| Co(1)-O(1)#1      | 2.082(2)   | O(1)#1-Co(1)-N(7)   | 89.29(11)  | N(7)#1-Co(1)-N(1)   | 88.91(12)  |
| Co(1)-N(7)        | 2.142(3)   | O(1)-Co(1)-N(7)#1   | 89.29(11)  | O(1)-Co(1)-N(1)#1   | 89.86(11)  |
| Co(1)-N(7)#1      | 2.142(3)   | O(1)#1-Co(1)-N(7)#1 | 90.71(11)  | O(1)#1-Co(1)-N(1)#1 | 90.14(11)  |
| Co(1)-N(1)        | 2.150(3)   | N(7)-Co(1)-N(7)#1   | 180.00(16) | N(7)-Co(1)-N(1)#1   | 88.91(12)  |
| Co(1)-N(1)#1      | 2.150(3)   | O(1)-Co(1)-N(1)     | 90.14(11)  | N(7)#1-Co(1)-N(1)#1 | 91.09(12)  |
| O(1)-Co(1)-O(1)#1 | 180.00(18) | O(1)#1-Co(1)-N(1)   | 89.86(11)  | N(1)-Co(1)-N(1)#1   | 180        |
| complex 3         |            |                     |            |                     |            |
| Co(1)-O(1)#1      | 2.098(2)   | O(1)#1-Co(1)-N(3)   | 92.15(11)  | N(3)-Co(1)-N(2)     | 93.11(11)  |
| Co(1)-O(1)        | 2.098(2)   | O(1)-Co(1)-N(3)     | 87.85(11)  | N(3)#1-Co(1)-N(2)   | 86.89(11)  |
| Co(1)-N(3)        | 2.159(3)   | O(1)#1-Co(1)-N(3)#1 | 87.85(11)  | O(1)#1-Co(1)-N(2)#1 | 87.74(10)  |
| Co(1)-N(3)#1      | 2.159(3)   | O(1)-Co(1)-N(3)#1   | 92.15(11)  | O(1)-Co(1)-N(2)#1   | 92.26(10)  |
| Co(1)-N(2)        | 2.169(3)   | N(3)-Co(1)-N(3)#1   | 180.0(2)   | N(3)-Co(1)-N(2)#1   | 86.89(11)  |
| Co(1)-N(2)#1      | 2.169(3)   | O(1)#1-Co(1)-N(2)   | 92.26(10)  | N(3)#1-Co(1)-N(2)#1 | 93.11(11)  |
| O(1)#1-Co(1)-O(1) | 180.00(14) | O(1)-Co(1)-N(2)     | 87.74(10)  | N(2)-Co(1)-N(2)#1   | 180.00(13) |

| complex 4         |            |                     |            |                      |            |
|-------------------|------------|---------------------|------------|----------------------|------------|
| N(4)-Co(1)#1      | 2.1236(19) | N(4)#2-Co(1)-N(4)#3 | 180.00(5)  | N(4)#3-Co(1)-Cl(1)   | 89.18(5)   |
| Co(1)-N(4)#2      | 2.1236(19) | N(4)#2-Co(1)-N(1)   | 91.95(7)   | N(1)-Co(1)-Cl(1)     | 89.04(6)   |
| Co(1)-N(4)#3      | 2.1236(19) | N(4)#3-Co(1)-N(1)   | 88.05(7)   | N(1)#4-Co(1)-Cl(1)   | 90.96(6)   |
| Co(1)-N(1)        | 2.1589(19) | N(4)#2-Co(1)-N(1)#4 | 88.05(7)   | N(4)#2-Co(1)-Cl(1)#4 | 89.18(5)   |
| Co(1)-N(1)#4      | 2.1589(19) | N(4)#3-Co(1)-N(1)#4 | 91.95(7)   | N(4)#3-Co(1)-Cl(1)#4 | 90.82(5)   |
| Co(1)-Cl(1)       | 2.5189(10) | N(1)-Co(1)-N(1)#4   | 180.000(1) | N(1)-Co(1)-Cl(1)#4   | 90.96(6)   |
| Co(1)-Cl(1)#4     | 2.5189(10) | N(4)#2-Co(1)-Cl(1)  | 90.82(5)   | N(1)#4-Co(1)-Cl(1)#4 | 89.04(6)   |
|                   |            |                     |            | Cl(1)-Co(1)-Cl(1)#4  | 180        |
| complex 5         |            |                     |            |                      |            |
| Co(1)-O(2)#3      | 2.030(2)   | O(2)#3-Co(1)-O(3)#4 | 97.08(8)   | O(3)#4-Co(1)-N(1)    | 87.44(10)  |
| Co(1)-O(1)        | 2.036(2)   | O(1)-Co(1)-O(3)#4   | 153.60(9)  | N(4)-Co(1)-N(1)      | 173.40(10) |
| Co(1)-O(3)#4      | 2.136(2)   | O(2)#3-Co(1)-N(4)   | 86.35(10)  | O(2)#3-Co(1)-O(4)#4  | 156.78(8)  |
| Co(1)-N(4)        | 2.143(3)   | O(1)-Co(1)-N(4)     | 89.29(9)   | O(1)-Co(1)-O(4)#4    | 94.53(8)   |
| Co(1)-N(1)        | 2.155(3)   | O(3)#4-Co(1)-N(4)   | 86.56(10)  | O(3)#4-Co(1)-O(4)#4  | 59.74(8)   |
| Co(1)-O(4)#4      | 2.257(2)   | O(2)#3-Co(1)-N(1)   | 91.68(10)  | N(4)-Co(1)-O(4)#4    | 93.12(9)   |
| O(2)#3-Co(1)-O(1) | 108.67(9)  | O(1)-Co(1)-N(1)     | 97.30(10)  | N(1)-Co(1)-O(4)#4    | 86.20(10)  |
| complex 6         |            |                     |            |                      |            |
| Co(1)-O(4)#1      | 2.017(3)   | O(1)-Co(1)-O(6)#2   | 104.78(10) | O(7)#3-Co(2)-O(2)    | 92.94(11)  |
| Co(1)-O(1)        | 2.057(3)   | O(4)#1-Co(1)-N(2)   | 89.27(12)  | O(7)-Co(2)-O(2)      | 87.06(11)  |
| Co(1)-O(6)#2      | 2.126(3)   | O(1)-Co(1)-N(2)     | 87.54(12)  | O(7)#3-Co(2)-O(2)#3  | 87.06(11)  |
| Co(1)-N(2)        | 2.130(3)   | O(6)#2-Co(1)-N(2)   | 89.65(12)  | O(7)-Co(2)-O(2)#3    | 92.94(11)  |
| Co(1)-N(1)        | 2.147(4)   | O(4)#1-Co(1)-N(1)   | 96.14(12)  | O(2)-Co(2)-O(2)#3    | 180.000(1) |
| Co(1)-O(5)#2      | 2.176(3)   | O(1)-Co(1)-N(1)     | 87.41(13)  | O(7)#3-Co(2)-N(5)#3  | 85.96(14)  |
| Co(2)-O(7)#3      | 2.083(3)   | O(6)#2-Co(1)-N(1)   | 87.19(12)  | O(7)-Co(2)-N(5)#3    | 94.04(14)  |

|                     |            |                     |            |                     |            |
|---------------------|------------|---------------------|------------|---------------------|------------|
| Co(2)-O(7)          | 2.083(3)   | N(2)-Co(1)-N(1)     | 173.17(13) | O(2)-Co(2)-N(5)#3   | 86.61(13)  |
| Co(2)-O(2)          | 2.107(3)   | O(4)#1-Co(1)-O(5)#2 | 94.72(11)  | O(2)#3-Co(2)-N(5)#3 | 93.39(13)  |
| Co(2)-O(2)#3        | 2.107(3)   | O(1)-Co(1)-O(5)#2   | 165.14(10) | O(7)#3-Co(2)-N(5)   | 94.04(14)  |
| Co(2)-N(5)#3        | 2.117(4)   | O(6)#2-Co(1)-O(5)#2 | 60.39(10)  | O(7)-Co(2)-N(5)     | 85.96(14)  |
| Co(2)-N(5)          | 2.117(4)   | N(2)-Co(1)-O(5)#2   | 92.99(12)  | O(2)-Co(2)-N(5)     | 93.39(13)  |
| O(4)#1-Co(1)-O(1)   | 100.14(11) | N(1)-Co(1)-O(5)#2   | 90.72(13)  | O(2)#3-Co(2)-N(5)   | 86.61(13)  |
| O(4)#1-Co(1)-O(6)#2 | 155.00(11) | O(7)#3-Co(2)-O(7)   | 180.00(16) | N(5)#3-Co(2)-N(5)   | 180.00(11) |
| complex 7           |            |                     |            |                     |            |
| Co(1)-O(2)#1        | 2.105(2)   | O(2)#1-Co(1)-O(1)   | 93.59(9)   | O(1)-Co(1)-N(1)     | 94.30(11)  |
| Co(1)-O(2)          | 2.105(2)   | O(2)-Co(1)-O(1)     | 86.41(9)   | O(1)#1-Co(1)-N(1)   | 85.70(11)  |
| Co(1)-O(1)          | 2.115(2)   | O(2)#1-Co(1)-O(1)#1 | 86.41(9)   | O(2)#1-Co(1)-N(1)#1 | 90.95(10)  |
| Co(1)-O(1)#1        | 2.115(2)   | O(2)-Co(1)-O(1)#1   | 93.59(9)   | O(2)-Co(1)-N(1)#1   | 89.05(10)  |
| Co(1)-N(1)          | 2.126(3)   | O(1)-Co(1)-O(1)#1   | 180.00(13) | O(1)-Co(1)-N(1)#1   | 85.70(11)  |
| Co(1)-N(1)#1        | 2.126(3)   | O(2)#1-Co(1)-N(1)   | 89.05(10)  | O(1)#1-Co(1)-N(1)#1 | 94.30(11)  |
| O(2)#1-Co(1)-O(2)   | 180.00(13) | O(2)-Co(1)-N(1)     | 90.95(10)  | N(1)-Co(1)-N(1)#1   | 180.0(2)   |

Symmetry transformations used to generate equivalent atoms: (1) #1 -x,-y+2,-z+1; #2 -x-1,-y+1,-z+1; #3 -x,-y+1,-z. (2) #1 -x+1,-y+1,-z; #2 -x,-y,-z; #3 -x+1,-y,-z+1. (3) #1 -x+2,-y,-z; #2 -x+1,-y,-z+1. (4) #1 -x+1,y-1/2,-z+3/2; #2 x-1,-y+1/2,z+1/2; #3 -x+1,y+1/2,-z+3/2; #4 -x,-y+1,-z+2. (5) #1 -x+1,-y+1,-z; #2 -x+2,-y+1,-z. (6) #1 -x,-y+3,-z+2; #2 -x+2,-y+2,-z; #3 -x,-y+2,-z+1; #4 x,y+1,z; #5 x,y-1,z. (7) #1 x,y+1,z; #2 -x,y+1/2,-z+3/2; #3 -x+1,-y,-z+2; #4 -x,y-1/2,-z+3/2; #5 x,y-1,z; #6 x-1,y-1,z; #7 x+1,y+1,z; #8 -x+2,-y+1,-z+2.
